# Supplementary material for: Integrated microreaction system for optical resolution of racemic amino acids
Source: Royal Society of Chemistry journal article supplement (doi:10.1039/b614500k), 2007-01-01
Supplement: b614500k.pdf [file b614500k.pdf]

## Supplementary Information

# Integrated microreaction system for optical resolution of racemic amino acids

Takeshi Honda,<sup>a</sup> Masaya Miyazaki,<sup>a,b,\*</sup> Yoshiko Yamaguchi,<sup>a</sup> Hiroyuki Nakamura,<sup>a</sup> and Hideaki Maeda<sup>a,b,\*</sup>

<sup>a</sup> Nanotechnology Research Institute, National Institute of Advanced Industrial Science and Technology (AIST), 807-1 Shuku, Tosu, Saga 841-0052, Japan. Fax: +81(942)81-3657; Tel: +81(942)81-3676; \*E-mail: m.miyazaki@aist.go.jp or maeda-h@aist.go.jp

<sup>b</sup> Department of Molecular and Material Science, Interdisciplinary Graduate School of Engineering Sciences, Kyushu University, 6-1 Kasuga Koen, Kasuga, Fukuoka 816-8580, Japan. Fax & Tel: +81(92)583-8891.

### Design of the microchannels

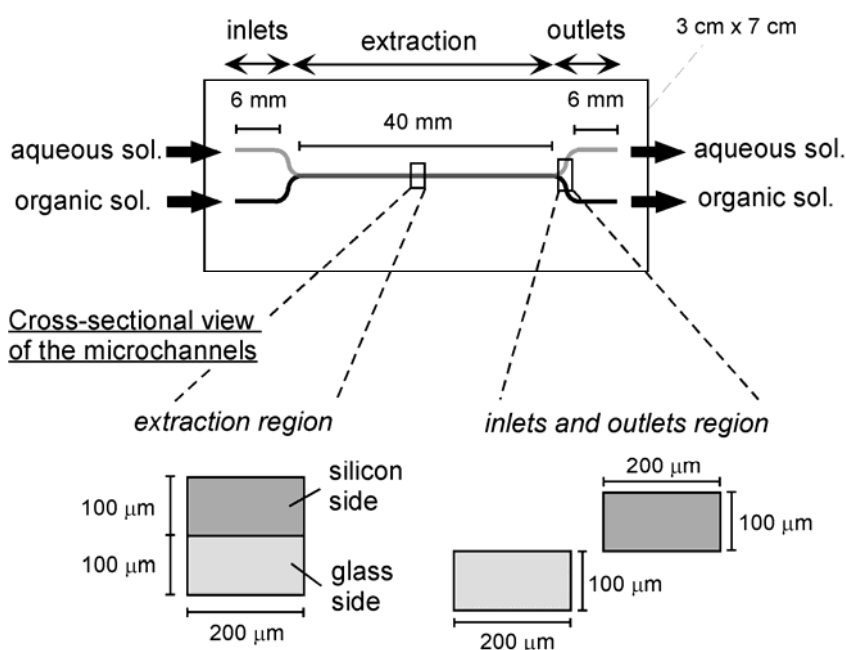

Figure S1 Design of the microchannels in the microextractor.

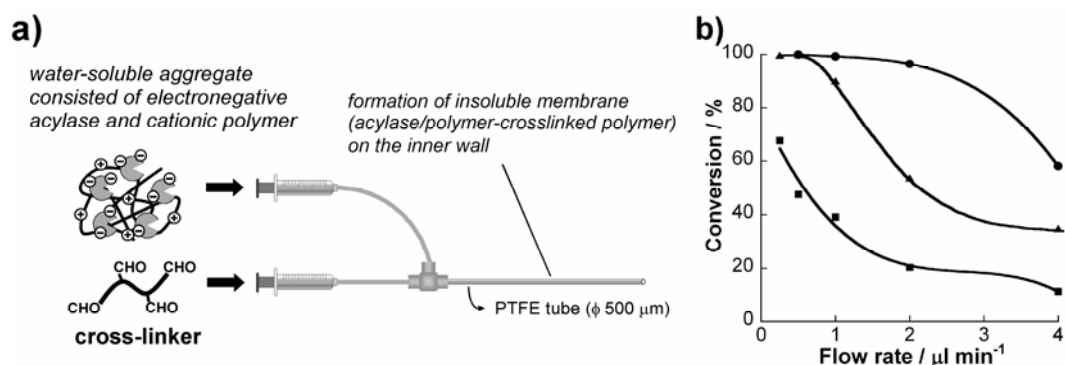

**Figure S2** a) Preparation of insoluble enzyme-membrane on the inner wall of a PTFE tube. Cross-linker reagent with aldehyde group and a water-soluble aggregate consisting of anionic acylase and cationic poly-Lys were each charged into a 1-ml syringe. The solutions were supplied to a PTFE tube using a syringe pump at 4°C. Consequently, an insoluble acylase-containing membrane was formed cylindrically on the tube's inner wall. b) Hydrolysis of acetyl-D,L-Phe in a microreactor. A solution of substrate in Tris buffer (pH 8.0) was charged into a tubing microreactor (inner volume = 24  $\mu\text{l}$ ) with acylase/polyLys-crosslinked membrane at various flow rates. The reactions were carried out at 37°C at three concentrations (1 mM (●), 4 mM (▲), and 20 mM (■)). Products were analyzed using RP-HPLC. This acylase-based reaction converted L-body only.

Enzymatic conversion of acetyl-L-Phe to L-Phe (%) =  $100 \times (\text{moles of L-Phe produced}) / (\text{moles of acetyl-L-Phe fed})$ .

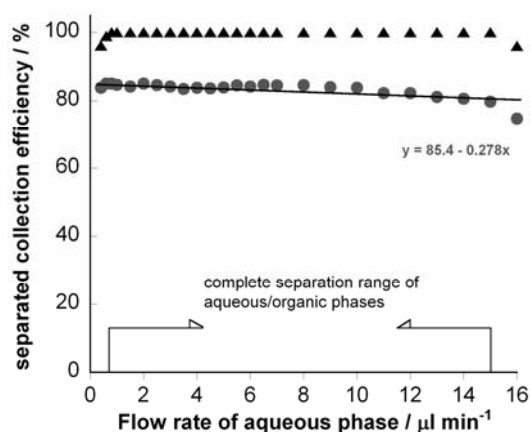

**Figure S3** Extraction efficiency of acetyl-D-Phe (●) from the aqueous phase and residual ratio of L-Phe (▲) in aqueous phase. The ratio of flow rates between aqueous and organic phase was constant at 1:2. The horizontal axis shows the flow rate of aqueous phase.

For greater improvement of processing efficiency, we examined the relationship between residence time and extraction efficiency. A substrate solution used an equimolar L-Phe and Ac-D-Phe mixture corresponding to complete hydrolysis, instead of Ac-D,L-Phe solution. The ratio of aqueous and organic flow rates was kept constant at 1:2. Each phase was separated completely at aqueous flow rates of 0.8 – 15  $\mu\text{l min}^{-1}$ . In the fastest flow rate corresponding to 3.2 s of

residence time of the aqueous phase, the extraction efficiency of Ac-D-Phe achieved 80%. When using 1 mM substrate, the extraction yield ( $6.00 \text{ nmol min}^{-1}$ ) of Ac-D-Phe per unit time increased to about seven times that of the yield ( $0.87 \text{ nmol min}^{-1}$ ) at a  $1 \mu\text{l min}^{-1}$  aqueous flow rate. Acceleration of optical separation was feasible if complete hydrolysis is achieved at a faster flow rate, for example, by mutually joining several CEMs.

**Table S1** Kinetic parameters of various amino acid derivatives in hydrolysis assay using acylase-CEM.

| Amino acids          | $K_m$ (mM) <sup>a</sup> | $V_{\max}$ (mM min <sup>-1</sup> ) <sup>b</sup> |
|----------------------|-------------------------|-------------------------------------------------|
| Thi                  | 0.387                   | 0.120                                           |
| Phe                  | 0.065                   | 0.115                                           |
| ( <i>p</i> -F)Phe    | 0.188                   | 0.126                                           |
| Cha                  | 0.710                   | 0.106                                           |
| (F <sub>5</sub> )Phe | 0.233                   | 0.081                                           |
| Bpa                  | 0.064                   | 0.027                                           |
| Nal                  | 0.130                   | 0.063                                           |

<sup>a</sup> The  $K_m$  and  $V_{\max}$  were computed by fitting the data to the Michaelis-Menten equation using a public domain program: GNUPLOT.
